# Supplementary material for: Cheetahs (Acinonyx jubatus) running the gauntlet: an evaluation of translocations into free-range environments in Namibia
Source: PeerJ journal article supplement (doi:10.7717/peerj.1346), 2015-10-22
Supplement: Suppl_Inf_2_Behavioural_classification.pdf [file Suppl_Inf_2_Behavioural_classification.pdf]

**Supplemental Information 2** - Classification used to determine degree of habituation of translocated cheetahs.

| Degree of habituation | Specific behavioural response                                                                                                                                                                                                                                                                                              |
|-----------------------|----------------------------------------------------------------------------------------------------------------------------------------------------------------------------------------------------------------------------------------------------------------------------------------------------------------------------|
| Wild                  | <p>Subject does not tolerate human presence in any context;</p> <p>Subject exhibits typical natural avoidance behaviour and flight response – no direct observation possible;</p> <p>Subject exhibits strong signs of stress/discomfort when confined – hissing, spitting, stomping, attempt to escape.</p>                |
| Semi-habituated       | <p>Except for feeding context, subject always avoids human presence;</p> <p>Subject exhibits expected flight response after food is obtained and seeks cover;</p> <p>Subject exhibits obvious signs of stress/discomfort when confined – hissing, spitting, stomping.</p>                                                  |
| Habituated            | <p>Subject tolerates human presence beyond feeding events;</p> <p>Subject does not exhibit typical flight or avoidance behaviour when approached;</p> <p>No direct/physical contact possible (contrary to tame);</p> <p>Subject exhibits reduced signs of stress/discomfort when confined (e.g. only mild irritation).</p> |

---
