# Supplementary material for: Cheetahs (Acinonyx jubatus) running the gauntlet: an evaluation of translocations into free-range environments in Namibia
Source: PeerJ journal article supplement (doi:10.7717/peerj.1346), 2015-10-22
Supplement: Suppl_Inf_3_Recipient_reserve_characteristics.pdf [file Suppl_Inf_3_Recipient_reserve_characteristics.pdf]

**Supplemental Information 3 – Key characteristics of cheetah recipient reserves.**

| ID (Region)<br>Location                                                                          | Size in<br>km <sup>2</sup> | Key climate<br>characteristics<br>(Source: Mendelsohn et<br>al., 2002)                                | Key habitat and vegetation characteristics<br>(Source: Mendelsohn et al., 2002)                                                                                                                                                                                                                                                                           | Key prey species                                                                                                                                        | Documented<br>predator guild<br>(density –<br>Hanssen &<br>Stander, 2004)                                                                         | Connectivity<br>with other<br>conservation<br>areas | Animals<br>received                                                           |
|--------------------------------------------------------------------------------------------------|----------------------------|-------------------------------------------------------------------------------------------------------|-----------------------------------------------------------------------------------------------------------------------------------------------------------------------------------------------------------------------------------------------------------------------------------------------------------------------------------------------------------|---------------------------------------------------------------------------------------------------------------------------------------------------------|---------------------------------------------------------------------------------------------------------------------------------------------------|-----------------------------------------------------|-------------------------------------------------------------------------------|
| NamibRand<br>Nature Reserve<br>(Hardap)<br>GPS:<br>S -24.97068<br>E 16.02452                     | 1,722                      | Arid<br>Annual rain: 100-150mm<br>(50-70% variation)<br>Erratic rains<br>Regular droughts             | Habitat: Namib plains with prominent inselbergs<br>Biome: Nama-Karoo and Desert<br>Vegetation structure: mixed southern desert and<br>desert – dwarf shrub transition<br>Features:<br>Sand dunes<br>Open grass plains with rock and gravel substrate<br>Dwarf shrub savannah<br>Mountain escarpment<br>Artificial water holes<br>No fencing               | steenbok, klipspringer,<br>springbok, oryx, red<br>hartebeest, greater kudu,<br>mountain zebra, plains<br>zebra, blesbok, ostrich                       | leopard (low-<br>medium), cheetah<br>(low), spotted<br>hyaena (medium-<br>high), brown hyaena<br>(low-medium),<br>black-backed jackal,<br>caracal | Yes                                                 | Aju01,02,03<br>Aju07 + 2 cubs<br>Aju17<br>Aju18<br>Aju29,30<br>Aju58 + 2 cubs |
| Sandfontein<br>Private Nature<br>and Game<br>Reserve (Karas)<br>GPS:<br>S -28.6752<br>E 18.59589 | 760                        | Arid<br>Annual rain: 50-100mm<br>(50-60% variation)<br>Erratic rains<br>Regular droughts              | Habitat: Gompkab Basin with dissecting rolling hills<br>Biome: Nama Karoo<br>Vegetation structure: Karas dwarf shrubland<br>Features:<br>Open grass plains with rock and gravel substrate<br>Dwarf shrub savannah<br>Inselbergs<br>Mountain escarpment<br>Artificial water holes<br>Access to permanent Orange River<br>Riverine woodland<br>Game fencing | steenbok, common duiker,<br>klipspringer, springbok,<br>greater kudu, oryx, red<br>hartebeest, plains zebra,<br>common eland, common<br>impala, ostrich | leopard (low),<br>cheetah (n/a),<br>spotted hyaena<br>(n/a), brown hyaena<br>(low), black-backed<br>jackal, caracal                               | No                                                  | Aju42,43,44<br>Aju59 + 3 cubs                                                 |
| Kulala<br>Wilderness<br>Reserve<br>(Hardap)<br>GPS:<br>S -24.70415<br>E 15.82466                 | 339                        | Arid<br>Annual rain: 50-150mm<br>(50-60% variation)<br>Erratic rains<br>Regular droughts              | Habitat: Namib plains with prominent inselbergs<br>Biome: Nama-Karoo<br>Vegetation type: desert – dwarf shrub transition<br>Features:<br>Sand dunes<br>Open grass plains with rock and gravel substrate<br>Dwarf shrub savannah<br>Artificial water holes<br>No fencing                                                                                   | steenbok, klipspringer,<br>springbok, oryx, greater<br>kudu, ostrich                                                                                    | leopard (low),<br>cheetah (low),<br>spotted hyaena<br>(medium-high),<br>brown hyaena (low-<br>medium), black-<br>backed jackal,<br>caracal        | Yes                                                 | Aju19,20                                                                      |
| Namib Desert<br>Lodge (Khomas<br>and Hardap)<br>GPS:<br>S -23.92416<br>E 15.81008                | 250                        | Arid<br>Annual rain: 100-150mm<br>(50-70% variation)<br>Erratic rains<br>Regular droughts             | Habitat: Namib plains with prominent inselbergs<br>Biome: Nama-Karoo<br>Vegetation type: desert – dwarf shrub transition<br>Features:<br>Sand dunes<br>Open grass plains with rock and gravel substrate<br>Dwarf shrub savannah<br>Mountain escarpment<br>Artificial water holes<br>No fencing                                                            | steenbok, klipspringer,<br>springbok, oryx, greater<br>kudu, ostrich                                                                                    | leopard (low-<br>medium), cheetah<br>(low), spotted<br>hyaena (medium),<br>brown hyaena (low-<br>medium), black-<br>backed jackal,<br>caracal     | Yes                                                 | Aju40,41                                                                      |
| Frauenstein -<br>Ondekaremba<br>Complex<br>(Khomas)<br>GPS:<br>S -22.40366<br>E 17.42077         | 112                        | Semi-arid<br>Annual rain: 350-400mm<br>(30-40% variation)<br>Variable rains<br>Irregular droughts     | Habitat: Khomas Hochland Plateau<br>Biome: Savannah<br>Vegetation type: Highland shrubland<br>Features:<br>Undulating terrain<br><i>Acacia</i> -encroached thickets with open glades<br>Artificial water holes<br>Cattle and game fencing                                                                                                                 | steenbok, common duiker,<br>springbok, oryx, greater<br>kudu, red hartebeest,<br>ostrich, warthog                                                       | leopard (medium),<br>cheetah (medium),<br>brown hyaena (low),<br>black-backed jackal,<br>caracal                                                  | No                                                  | Aju26<br>Aju34<br>Aju56 + 3 cubs<br>Aju65,66                                  |
| Solitaire Guest<br>Farm<br>(Khomas)<br>GPS:<br>S -23.88794<br>E 16.01535                         | 95                         | Semi-arid - Arid<br>Annual rain: 100-200mm<br>(50-60% variation)<br>Erratic rains<br>Regular droughts | Habitat: Namib plains with prominent inselbergs<br>Biome: Nama-Karoo<br>Vegetation type: desert – dwarf shrub transition<br>Features:<br>Open grass plains with rock and gravel substrate<br>Dwarf shrub savannah<br>Mountain escarpment<br>Artificial water holes<br>Cattle and game fencing                                                             | steenbok, klipspringer,<br>springbok, oryx, greater<br>kudu, ostrich                                                                                    | leopard (low-<br>medium), cheetah<br>(low), spotted<br>hyaena (medium-<br>high), brown hyaena<br>(low-medium),<br>black-backed jackal,<br>caracal | Yes                                                 | Aju38                                                                         |
