# Supplementary material for: Cheetahs (Acinonyx jubatus) running the gauntlet: an evaluation of translocations into free-range environments in Namibia
Source: PeerJ journal article supplement (doi:10.7717/peerj.1346), 2015-10-22
Supplement: Suppl_Inf_9_Potential_cheetah_recipient_areas_without_site_fidelity.pdf [file Suppl_Inf_9_Potential_cheetah_recipient_areas_without_site_fidelity.pdf]

**Supplemental Information 9** – Potential cheetah recipient areas in Namibia without site fidelity considerations.

| ID (region)                         | Suitable patch size<br>(km <sup>2</sup> ) | Protected area<br>category |
|-------------------------------------|-------------------------------------------|----------------------------|
| Namib Naukluft Park (Hardap/Erongo) | 10,785.3                                  | National park              |
| Otjombinde (Omaheke)                | 1,738.0                                   | Communal conservancy       |
| Otjituuo 1 (Otjozondjupa)           | 765.6                                     | Communal conservancy       |
| !Han /Awab (Karas)                  | 672.7                                     | Communal conservancy       |
| Sperrgebiet (Karas)                 | 351.5                                     | National park              |
| Otjituuo 2 (Otjozondjupa)           | 294.4                                     | Communal conservancy       |
| African Wild Dog (Otjozondjupa)     | 262.0                                     | Communal conservancy       |
| N=/=a Jaqna (Otjozondjupa)          | 96.9                                      | Communal conservancy       |
| Ai-Ais Hot Springs (Karas)          | 54.8                                      | National park              |
| Ozonahi (Otjozondjupa)              | 50.1                                      | Communal conservancy       |
